# Supplementary material
Source: publisher figshare collection journal article supplement (https://karger.figshare.com/ndownloader/files/13440293)
Supplement: Supplementary file 1 [file 13440293]

**Supplemental table 1.** **Baseline characteristics of study population by tertiles of calcification markers.**

| Calcification marker | Age, years | Female, % |  | Race, % | | |  | Index of coexisting disease, % | | | Diabetes, % | CRP, mg/dL |
| --- | --- | --- | --- | --- | --- | --- | --- | --- | --- | --- | --- | --- |
|  | Black | White | Others |  | Mild | Moderate | Severe |
| Fetuin- A |  |  |  |  |  |  |  |  |  |  |  |  |
| Tertile 1 (0.18-0.42 g/L) | 61.0 (13.2) | 47.1 |  | 62.9 | 34.3 | 2.9 |  | 25.7 | 42.9 | 31.4 | 64.3 | 1.0 (1.5) |
| Tertile 2 (0.43-0.55 g/L) | 60.9 (14.2) | 47.3 |  | 55.4 | 32.4 | 12.2 |  | 27.0 | 45.9 | 27.0 | 59.5 | 0.8 (1.2) |
| Tertile 3 (0.55-1.10 g/L) | 54.2 (15.2) | 50.7 |  | 66.7 | 29.3 | 4.0 |  | 44.0 | 36.0 | 20.0 | 42.7 | 0.5 (0.6) |
| P for trend | 0.003 | 0.67 |  | 0.18 | | |  | 0.13 | | | 0.008 | 0.02 |
|  |  |  |  |  |  |  |  |  |  |  |  |  |
| Osteopontin | |  |  |  |  |  |  |  |  |  |  |  |
| Tertile 1 (8.05-106.68 ng/ml) | 58.3 (12.4) | 45.1 |  | 69.0 | 22.5 | 8.4 |  | 39.4 | 42.3 | 18.3 | 59.1 | 0.6 (0.6) |
| Tertile 2 (106.91-191.74 ng/ml) | 60.4 (13.8) | 50.7 |  | 70.7 | 22.7 | 6.7 |  | 30.7 | 45.3 | 24.0 | 60.0 | 0.9 (1.4) |
| Tertile 3 (198.24-500.00 ng/ml) | 57.4 (16.6) | 50.0 |  | 45.8 | 50.0 | 4.2 |  | 27.8 | 37.5 | 34.7 | 47.2 | 0.9 (1.3) |
| P for trend | 0.69 | 0.56 |  | 0.002 | | |  | 0.20 | | | 0.22 | 0.17 |
|  | |  |  |  |  |  |  |  |  |  |  |  |
| Osteoprotegerin | |  |  |  |  |  |  |  |  |  |  |  |
| Tertile 1 (1.60-9.24 pmol/L) | 50.3 (14.9) | 41.1 |  | 61.6 | 31.5 | 6.8 |  | 37.0 | 38.4 | 24.7 | 31.5 | 0.7 (0.9) |
| Tertile 2 (9.34-12.99 pmol/L) | 58.8 (12.8) | 45.2 |  | 63.0 | 32.9 | 4.1 |  | 28.8 | 42.5 | 28.8 | 71.2 | 0.9 (1.4) |
| Tertile 3 (13.02-32.00 pmol/L) | 66.8 (10.8) | 58.9 |  | 60.3 | 31.5 | 8.2 |  | 31.5 | 43.8 | 24.7 | 63.0 | 0.8 (1.2) |
| P for trend | <0.0001 | 0.08 |  | 0.91 | | |  | 0.85 | | | <0.001 | 0.64 |
|  | | |  |  |  |  |  |  |  |  |  |  |
| Bone morphogenetic protein-7 | | |  |  |  |  |  |  |  |  |  |  |
| Tertile 1 (1.95-9.24 pg/ml) | 60.4 (13.0) | 61.1 |  | 56.9 | 31.9 | 11.1 |  | 37.5 | 31.9 | 30.6 | 58.3 | 0.8 (1.1) |
| Tertile 2 (9.34-12.99 pg/ml) | 56.8 (15.6) | 35.1 |  | 74.3 | 21.6 | 4.1 |  | 25.7 | 48.6 | 25.7 | 56.8 | 0.7 (1.1) |
| Tertile 3 (13.02-32.00 pg/ml) | 58.8 (15.1) | 47.9 |  | 54.9 | 40.8 | 4.2 |  | 33.8 | 43.7 | 22.5 | 50.7 | 0.8 (1.3) |
| P for trend | 0.60 | 0.007 |  | 0.04 | | |  | 0.27 | | | 0.61 | 0.93 |
